# Supplementary material for: Prospects of production technologies and manufacturing costs of oxide-based all-solid-state lithium batteries
Source: Royal Society of Chemistry journal article supplement (doi:10.1039/c8ee02692k), 2019-01-01
Supplement: c8ee02692k1.pdf [file c8ee02692k1.pdf]

*Prospects on production technologies and manufacturing cost of oxide-based all-solid-state lithium batteries*  
*Supplementary information*

**Prospects on production technologies and manufacturing cost of oxide-based all-solid-state lithium batteries**

**Supplementary information**

**S1. Technology evaluation – technical suitability**

*Table S 1: Pairwise comparison for weighting of criteria for SSE layer fabrication, filled by experts in ceramics processing.*

|                                       | Material requirements                 |                                | Product requirements |               |          | Production requirements |            |     |                      |
|---------------------------------------|---------------------------------------|--------------------------------|----------------------|---------------|----------|-------------------------|------------|-----|----------------------|
|                                       | Thermal stability of coating material | Thermal stability of substrate | Error rate           | Layer density | Geometry | Environment             | Throughput | Sum | Normalized ( $w_i$ ) |
| Thermal stability of coating material |                                       | 2                              | 1                    | 1             | 2        | 2                       | 2          | 10  | 3                    |
| Thermal stability of substrate        | 0                                     |                                | 0                    | 0             | 2        | 1                       | 2          | 5   | 2                    |
| Error rate                            | 1                                     | 2                              |                      | 1             | 2        | 2                       | 2          | 10  | 3                    |
| Layer density                         | 1                                     | 2                              | 1                    |               | 2        | 2                       | 2          | 10  | 3                    |
| Geometry                              | 0                                     | 0                              | 0                    | 0             |          | 0                       | 1          | 1   | 1                    |
| Environment                           | 0                                     | 1                              | 0                    | 0             | 2        |                         | 2          | 5   | 2                    |
| Throughput                            | 0                                     | 0                              | 0                    | 0             | 1        | 0                       |            | 1   | 1                    |

Table S 2: Decision matrix for SSE layer fabrication, filled by experts in ceramics processing.

|                                | Material requirements                 |                                |           | Product requirements |               |          |           | Production requirements |            |           | Score / ranking |
|--------------------------------|---------------------------------------|--------------------------------|-----------|----------------------|---------------|----------|-----------|-------------------------|------------|-----------|-----------------|
|                                | Thermal stability of coating material | Thermal stability of substrate | $M_{T_j}$ | Error rate           | Layer density | Geometry | $M_{T_j}$ | Environment             | Throughput | $M_{T_j}$ |                 |
| Weighting                      | 3                                     | 2                              |           | 3                    | 3             | 1        |           | 2                       | 1          |           |                 |
| Vacuum slip casting            | 3                                     | 3                              | 3.00      | 3                    | 0             | 3        | 1.71      | 3                       | 2          | 2.67      | 35              |
| Tape casting                   | 3                                     | 3                              | 3.00      | 2                    | 0             | 3        | 1.29      | 3                       | 3          | 3.00      | 33              |
| Screen Printing                | 3                                     | 3                              | 3.00      | 2                    | 0             | 3        | 1.29      | 3                       | 3          | 3.00      | 33              |
| Roller coating                 | 3                                     | 3                              | 3.00      | 2                    | 0             | 3        | 1.29      | 3                       | 2          | 2.67      | 32              |
| Elektrophoretic deposition     | 3                                     | 3                              | 3.00      | 2                    | 0             | 3        | 1.29      | 3                       | 1          | 2.33      | 31              |
| Aerosol deposition methods     | 2                                     | 3                              | 2.40      | 2                    | 2             | 3        | 2.14      | 1                       | 0          | 0.67      | 29              |
| Wet powder spraying            | 3                                     | 3                              | 3.00      | 1                    | 0             | 3        | 0.86      | 3                       | 1          | 2.33      | 28              |
| Extrusion                      | 3                                     | 3                              | 3.00      | 0                    | 0             | 3        | 0.43      | 3                       | 3          | 3.00      | 27              |
| VLPPS                          | 0                                     | 2                              | 0.80      | 3                    | 3             | 3        | 3.00      | 0                       | 1          | 0.33      | 26              |
| Dip Coating                    | 3                                     | 3                              | 3.00      | 0                    | 0             | 3        | 0.43      | 3                       | 0          | 2.00      | 24              |
| Spin Coating                   | 3                                     | 3                              | 3.00      | 0                    | 0             | 3        | 0.43      | 3                       | 0          | 2.00      | 24              |
| LPPS                           | 0                                     | 2                              | 0.80      | 3                    | 2             | 3        | 2.57      | 0                       | 2          | 0.67      | 24              |
| APS                            | 1                                     | 3                              | 1.80      | 2                    | 0             | 3        | 1.29      | 2                       | 2          | 2.00      | 24              |
| CVD                            | 0                                     | 2                              | 0.80      | 3                    | 3             | 0        | 2.57      | 0                       | 0          | 0.00      | 22              |
| EVD                            | 0                                     | 0                              | 0.00      | 3                    | 3             | 3        | 3.00      | 0                       | 0          | 0.00      | 21              |
| High-velocity oxyfuel spraying | 1                                     | 0                              | 0.60      | 2                    | 1             | 3        | 1.71      | 2                       | 2          | 2.00      | 21              |
| Flame spraying                 | 1                                     | 3                              | 1.80      | 0                    | 0             | 3        | 0.43      | 2                       | 2          | 2.00      | 18              |
| Pulsed Laser Deposition        | 2                                     | 2                              | 2.00      | 0                    | 1             | 1        | 0.57      | 0                       | 0          | 0.00      | 14              |
| PVD-Electric beam              | 1                                     | 1                              | 1.00      | 0                    | 1             | 3        | 0.86      | 0                       | 0          | 0.00      | 11              |
| PVD-Sputtering                 | 1                                     | 1                              | 1.00      | 0                    | 1             | 3        | 0.86      | 0                       | 0          | 0.00      | 11              |

Table S 3: Pairwise comparison for weighting of criteria for cathode composite fabrication, filled by experts in ceramics processing.

|                                       | Material requirements                 |                                | Product requirements |               |          | Production requirements |            |     |                      |
|---------------------------------------|---------------------------------------|--------------------------------|----------------------|---------------|----------|-------------------------|------------|-----|----------------------|
|                                       | Thermal stability of coating material | Thermal stability of substrate | Error rate           | Layer density | Geometry | Environment             | Throughput | Sum | Normalized ( $w_i$ ) |
| Thermal stability of coating material |                                       | 2                              | 2                    | 2             | 2        | 2                       | 2          | 12  | 3                    |
| Thermal stability of substrate        | 0                                     |                                | 1                    | 2             | 2        | 1                       | 1          | 7   | 2                    |
| Error rate                            | 0                                     | 1                              |                      | 2             | 2        | 1                       | 1          | 7   | 2                    |
| Layer density                         | 0                                     | 0                              | 0                    |               | 1        | 0                       | 0          | 1   | 1                    |
| Geometry                              | 0                                     | 0                              | 0                    | 1             |          | 0                       | 0          | 1   | 1                    |
| Environment                           | 0                                     | 1                              | 1                    | 2             | 2        |                         | 1          | 7   | 2                    |
| Throughput                            | 0                                     | 1                              | 1                    | 2             | 2        | 1                       |            | 7   | 2                    |

Table S 4: Decision matrix for cathode composite fabrication, filled by experts in ceramics processing.

|                                 | Material requirements                 |                                |           | Product requirements |               |          |           | Production requirements |            |           | Score / ranking |
|---------------------------------|---------------------------------------|--------------------------------|-----------|----------------------|---------------|----------|-----------|-------------------------|------------|-----------|-----------------|
|                                 | Thermal stability of coating material | Thermal stability of substrate | $M_{T_j}$ | Error rate           | Layer density | Geometry | $M_{T_j}$ | Environment             | Throughput | $M_{T_j}$ |                 |
| Weighting                       | 3                                     | 2                              |           | 2                    | 1             | 1        |           | 2                       | 2          |           |                 |
| Tape casting                    | 3                                     | 3                              | 3.00      | 3                    | 0             | 3        | 2.25      | 3                       | 3          | 3.00      | 36              |
| Screen printing                 | 3                                     | 3                              | 3.00      | 2                    | 0             | 3        | 1.75      | 3                       | 3          | 3.00      | 34              |
| Extrusion                       | 3                                     | 3                              | 3.00      | 1                    | 0             | 3        | 1.25      | 3                       | 3          | 3.00      | 32              |
| Roller coating                  | 3                                     | 3                              | 3.00      | 2                    | 0             | 3        | 1.75      | 3                       | 2          | 2.50      | 32              |
| Vacuum slip casting             | 3                                     | 3                              | 3.00      | 2                    | 0             | 3        | 1.75      | 3                       | 2          | 2.50      | 32              |
| Elektrophoretic deposition      | 3                                     | 3                              | 3.00      | 2                    | 0             | 3        | 1.75      | 3                       | 1          | 2.00      | 30              |
| Wet powder spraying             | 3                                     | 3                              | 3.00      | 2                    | 0             | 3        | 1.75      | 3                       | 1          | 2.00      | 30              |
| Atmospheric plasma spraying     | 1                                     | 3                              | 1.80      | 3                    | 2             | 3        | 2.75      | 2                       | 2          | 2.00      | 28              |
| Dip /Spin coating               | 3                                     | 3                              | 3.00      | 0                    | 0             | 3        | 0.75      | 3                       | 0          | 1.50      | 24              |
| Aerosol deposition methods      | 2                                     | 3                              | 2.40      | 2                    | 2             | 3        | 2.25      | 1                       | 0          | 0.50      | 23              |
| Flame spraying                  | 1                                     | 3                              | 1.80      | 1                    | 1             | 3        | 1.50      | 2                       | 2          | 2.00      | 23              |
| High-velocity oxy-fuel spraying | 0                                     | 1                              | 0.40      | 3                    | 2             | 3        | 2.75      | 2                       | 2          | 2.00      | 21              |
| LPPS                            | 0                                     | 2                              | 0.80      | 3                    | 3             | 3        | 3.00      | 0                       | 2          | 1.00      | 20              |
| VLPPS                           | 0                                     | 2                              | 0.80      | 3                    | 3             | 3        | 3.00      | 0                       | 1          | 0.50      | 18              |
| EVD                             | 2                                     | 2                              | 2.00      | 0                    | 3             | 3        | 1.50      | 0                       | 0          | 0.00      | 16              |
| CVD                             | 2                                     | 2                              | 2.00      | 0                    | 3             | 0        | 0.75      | 0                       | 0          | 0.00      | 13              |
| Pulsed Laser Deposition         | 2                                     | 2                              | 2.00      | 0                    | 1             | 1        | 0.50      | 0                       | 0          | 0.00      | 12              |
| PVD-Electric beam               | 1                                     | 1                              | 1.00      | 0                    | 1             | 3        | 1.00      | 0                       | 0          | 0.00      | 9               |
| PVD-Sputtering                  | 1                                     | 1                              | 1.00      | 0                    | 1             | 3        | 1.00      | 0                       | 0          | 0.00      | 9               |

## S2. Technology evaluation – technology maturity

Questionnaire to determine the maturity of aerosol coating for the production of ceramic solid state cells

|                                                                                                                                                                                                                                                                                                                                                                                                                                                                                                        |                                                                  |      |
|--------------------------------------------------------------------------------------------------------------------------------------------------------------------------------------------------------------------------------------------------------------------------------------------------------------------------------------------------------------------------------------------------------------------------------------------------------------------------------------------------------|------------------------------------------------------------------|------|
| General information                                                                                                                                                                                                                                                                                                                                                                                                                                                                                    |                                                                  |      |
| Technology designation<br>T2 Aerosol Coating                                                                                                                                                                                                                                                                                                                                                                                                                                                           | Responsible person, function, organization/institute, department | Date |
| <div style="text-align: left; padding: 5px;">General Data</div> <div style="display: flex; justify-content: space-between;"> <div style="width: 45%;">                 Producible layer thicknesses _____<br/><br/>                 Temperature input on coating material _____             </div> <div style="width: 45%;">                 Temperature input on substrate _____<br/><br/>                 The following compression/heat treatment step is necessary _____             </div> </div> |                                                                  |      |

  

|                                                                                                                                                                                                                                         |                                                                                                                                                                                                                                                           |
|-----------------------------------------------------------------------------------------------------------------------------------------------------------------------------------------------------------------------------------------|-----------------------------------------------------------------------------------------------------------------------------------------------------------------------------------------------------------------------------------------------------------|
| 1. fundamental research                                                                                                                                                                                                                 |                                                                                                                                                                                                                                                           |
| Maturity level description                                                                                                                                                                                                              |                                                                                                                                                                                                                                                           |
| This level is the lowest on the scale of maturity. It contains the basic mechanisms and principles of action as well as mathematical and physical descriptions and sketches. This results in theoretical concepts.                      |                                                                                                                                                                                                                                                           |
| 1.1<br><br>Is there a technical description of the (functional) principle of aerosol coating in the form of patents, publications, dissertations, with mathematical formulas, physical interrelations, geometry or material data, etc.? | <div style="display: flex; justify-content: space-around;"> <span>yes<br/><input type="checkbox"/></span> <span>no<br/><input type="checkbox"/></span> <span>uncertain<br/><input type="checkbox"/></span> </div> Degree of fulfilment / uncertainty:<br> |
| 1.2<br><br>Are the following process parameters known? Starting material, carrier gas and its consumption, nozzle settings, gas system, vibration system?                                                                               | <div style="display: flex; justify-content: space-around;"> <span>yes<br/><input type="checkbox"/></span> <span>no<br/><input type="checkbox"/></span> <span>uncertain<br/><input type="checkbox"/></span> </div> Degree of fulfilment / uncertainty:<br> |
| 1.3<br><br>Is there a technical production application area for the aerosol coating?                                                                                                                                                    | <div style="display: flex; justify-content: space-around;"> <span>yes<br/><input type="checkbox"/></span> <span>no<br/><input type="checkbox"/></span> <span>uncertain<br/><input type="checkbox"/></span> </div> Degree of fulfilment / uncertainty:<br> |
| 1.4<br><br>Are there several different applications (in several industries) for aerosol coating?<br>If so, which ones?                                                                                                                  | <div style="display: flex; justify-content: space-around;"> <span>yes<br/><input type="checkbox"/></span> <span>no<br/><input type="checkbox"/></span> <span>uncertain<br/><input type="checkbox"/></span> </div> Degree of fulfilment / uncertainty:<br> |
| 1.5<br><br>Is the future use of the technology in an industrial environment still speculative?                                                                                                                                          | <div style="display: flex; justify-content: space-around;"> <span>yes<br/><input type="checkbox"/></span> <span>no<br/><input type="checkbox"/></span> <span>uncertain<br/><input type="checkbox"/></span> </div> Degree of fulfilment / uncertainty:<br> |
| 1.6<br><br>Notes:                                                                                                                                                                                                                       | <div style="display: flex; justify-content: space-around;"> <span>yes<br/><input type="checkbox"/></span> <span>no<br/><input type="checkbox"/></span> <span>uncertain<br/><input type="checkbox"/></span> </div> Degree of fulfilment / uncertainty:<br> |

Figure S 1: Exemplary questionnaire to determine technology maturity – stage 1 (adapted and translated from Schindler (2015)<sup>1</sup>)

| Questionnaire to determine the maturity of aerosol coating for the production of ceramic solid state cells                                                                                                                                                                                                                                                                                                                                                                                                                                                                            |                                                                                                                                                                                                                                                                                                                                                                                                                                                                                                                                                                                                                                                  |  |
|---------------------------------------------------------------------------------------------------------------------------------------------------------------------------------------------------------------------------------------------------------------------------------------------------------------------------------------------------------------------------------------------------------------------------------------------------------------------------------------------------------------------------------------------------------------------------------------|--------------------------------------------------------------------------------------------------------------------------------------------------------------------------------------------------------------------------------------------------------------------------------------------------------------------------------------------------------------------------------------------------------------------------------------------------------------------------------------------------------------------------------------------------------------------------------------------------------------------------------------------------|--|
| <div style="display: flex; justify-content: space-between; border-bottom: 1px solid black; margin-bottom: 10px;"> <div style="width: 30%;">General information</div> </div> <div style="display: flex; justify-content: space-between;"> <div style="width: 30%; border: 1px solid black; padding: 5px;">Technology designation<br/>T2 Aerosol Coating</div> <div style="width: 40%; border: 1px solid black; padding: 5px;">Responsible person, function, organization/institute, department</div> <div style="width: 25%; border: 1px solid black; padding: 5px;">Date</div> </div> |                                                                                                                                                                                                                                                                                                                                                                                                                                                                                                                                                                                                                                                  |  |
| <div style="border-bottom: 1px solid black; margin-bottom: 10px;">2. Feasibility study</div> <div style="border-bottom: 1px solid black; margin-bottom: 10px;">Maturity level description</div> <p style="margin-bottom: 10px;">In this stage, the theories from stage 1 are tested using simple experiments or simulations. The aim is to identify influencing factors and requirements.</p>                                                                                                                                                                                         |                                                                                                                                                                                                                                                                                                                                                                                                                                                                                                                                                                                                                                                  |  |
| <div style="border-bottom: 1px solid black; margin-bottom: 10px;">2.1</div> <p>Are the essential functions of the system components (vacuum chamber system, gas system, vibration system, nozzle) known for the realization of the aerosol coating? Is it known what needs to be investigated experimentally or simulatively in order to demonstrate the feasibility of producing a cell layer?</p>                                                                                                                                                                                   | <div style="display: flex; justify-content: space-around; margin-bottom: 5px;"> <span>yes <input type="checkbox"/></span> <span>no <input type="checkbox"/></span> <span>uncertain <input type="checkbox"/></span> </div> <p style="margin-bottom: 5px;">Degree of fulfilment / uncertainty:</p> <div style="border: 1px solid black; height: 20px; position: relative;"> <div style="width: 0%; height: 100%; background: linear-gradient(to right, #ccc, #fff);"></div> <div style="position: absolute; bottom: 0; left: 0; right: 0; text-align: center; font-size: 8px;"> 0   10   20   30   40   50   60   70   80   90   100 </div> </div> |  |
| <div style="border-bottom: 1px solid black; margin-bottom: 10px;">2.2</div> <p>Are the essential conditions for a realization of the application identified? (e.g. boundary conditions such as laws, environmental conditions, etc.).</p>                                                                                                                                                                                                                                                                                                                                             | <div style="display: flex; justify-content: space-around; margin-bottom: 5px;"> <span>yes <input type="checkbox"/></span> <span>no <input type="checkbox"/></span> <span>uncertain <input type="checkbox"/></span> </div> <p style="margin-bottom: 5px;">Degree of fulfilment / uncertainty:</p> <div style="border: 1px solid black; height: 20px; position: relative;"> <div style="width: 0%; height: 100%; background: linear-gradient(to right, #ccc, #fff);"></div> <div style="position: absolute; bottom: 0; left: 0; right: 0; text-align: center; font-size: 8px;"> 0   10   20   30   40   50   60   70   80   90   100 </div> </div> |  |
| <div style="border-bottom: 1px solid black; margin-bottom: 10px;">2.3</div> <p>Have the essential process-related requirements for the implementation of the application been identified? (e.g. starting material)</p>                                                                                                                                                                                                                                                                                                                                                                | <div style="display: flex; justify-content: space-around; margin-bottom: 5px;"> <span>yes <input type="checkbox"/></span> <span>no <input type="checkbox"/></span> <span>uncertain <input type="checkbox"/></span> </div> <p style="margin-bottom: 5px;">Degree of fulfilment / uncertainty:</p> <div style="border: 1px solid black; height: 20px; position: relative;"> <div style="width: 0%; height: 100%; background: linear-gradient(to right, #ccc, #fff);"></div> <div style="position: absolute; bottom: 0; left: 0; right: 0; text-align: center; font-size: 8px;"> 0   10   20   30   40   50   60   70   80   90   100 </div> </div> |  |
| <div style="border-bottom: 1px solid black; margin-bottom: 10px;">2.4</div> <p>Have other technologies and resources been identified that are necessary to apply aerosol coatings? (Possible resources: gas connection, chamber)</p>                                                                                                                                                                                                                                                                                                                                                  | <div style="display: flex; justify-content: space-around; margin-bottom: 5px;"> <span>yes <input type="checkbox"/></span> <span>no <input type="checkbox"/></span> <span>uncertain <input type="checkbox"/></span> </div> <p style="margin-bottom: 5px;">Degree of fulfilment / uncertainty:</p> <div style="border: 1px solid black; height: 20px; position: relative;"> <div style="width: 0%; height: 100%; background: linear-gradient(to right, #ccc, #fff);"></div> <div style="position: absolute; bottom: 0; left: 0; right: 0; text-align: center; font-size: 8px;"> 0   10   20   30   40   50   60   70   80   90   100 </div> </div> |  |
| <div style="border-bottom: 1px solid black; margin-bottom: 10px;">2.5</div> <p>Has the technological feasibility of the individual function/subsystems been validated by fundamental experiments or analytically, e.g. by simulation?</p>                                                                                                                                                                                                                                                                                                                                             | <div style="display: flex; justify-content: space-around; margin-bottom: 5px;"> <span>yes <input type="checkbox"/></span> <span>no <input type="checkbox"/></span> <span>uncertain <input type="checkbox"/></span> </div> <p style="margin-bottom: 5px;">Degree of fulfilment / uncertainty:</p> <div style="border: 1px solid black; height: 20px; position: relative;"> <div style="width: 0%; height: 100%; background: linear-gradient(to right, #ccc, #fff);"></div> <div style="position: absolute; bottom: 0; left: 0; right: 0; text-align: center; font-size: 8px;"> 0   10   20   30   40   50   60   70   80   90   100 </div> </div> |  |
| <div style="border-bottom: 1px solid black; margin-bottom: 10px;">2.6</div> <p>Notes:</p>                                                                                                                                                                                                                                                                                                                                                                                                                                                                                             | <div style="display: flex; justify-content: space-around; margin-bottom: 5px;"> <span>yes <input type="checkbox"/></span> <span>no <input type="checkbox"/></span> <span>uncertain <input type="checkbox"/></span> </div> <p style="margin-bottom: 5px;">Degree of fulfilment / uncertainty:</p> <div style="border: 1px solid black; height: 20px; position: relative;"> <div style="width: 0%; height: 100%; background: linear-gradient(to right, #ccc, #fff);"></div> <div style="position: absolute; bottom: 0; left: 0; right: 0; text-align: center; font-size: 8px;"> 0   10   20   30   40   50   60   70   80   90   100 </div> </div> |  |

*Figure S 2: Exemplary questionnaire to determine technology maturity – stage 2 (adapted and translated from Schindler (2015)<sup>1</sup>)*

| Questionnaire to determine the maturity of aerosol coating for the production of ceramic solid state cells                                                                                                                                                                                                                                                                                                                                                                                                                                                                                                                                                                                                                                                                                                                                                                                                                                                                                                                                                                                                                                                                                                                                                                                                                                                                                                                                                                                                                                                                                                                                                                                                                                                                                                                                                                                                                                                                                                                                                                                                                                                                                                                                                                                                                                                                                                                                                                                                                                                                                                                                                                                                                                                                                                                                                                                                                                                                                                                                                                                                                                                                                                                                                                                                                                                                                                                                                                                                                                                                                                                                                                                                                                                                                                                                                                                                                                                                                                                                                                                                                                                                                                                                                                                                                                                                                                                                                                                                                                                                                                                                                                                                                                                                                                                                                                                                                                                                                                                                                                                                                                                                                                                                                                                                                                                                                                                                                                                                                                                                                                                                                                                                                                                                                                                                                                                                                                                                                                                                                                                                                                                                                                                                                                                                                                                                                                                                                                                                                                                                                                                                                                                                                              |  |  |
|-----------------------------------------------------------------------------------------------------------------------------------------------------------------------------------------------------------------------------------------------------------------------------------------------------------------------------------------------------------------------------------------------------------------------------------------------------------------------------------------------------------------------------------------------------------------------------------------------------------------------------------------------------------------------------------------------------------------------------------------------------------------------------------------------------------------------------------------------------------------------------------------------------------------------------------------------------------------------------------------------------------------------------------------------------------------------------------------------------------------------------------------------------------------------------------------------------------------------------------------------------------------------------------------------------------------------------------------------------------------------------------------------------------------------------------------------------------------------------------------------------------------------------------------------------------------------------------------------------------------------------------------------------------------------------------------------------------------------------------------------------------------------------------------------------------------------------------------------------------------------------------------------------------------------------------------------------------------------------------------------------------------------------------------------------------------------------------------------------------------------------------------------------------------------------------------------------------------------------------------------------------------------------------------------------------------------------------------------------------------------------------------------------------------------------------------------------------------------------------------------------------------------------------------------------------------------------------------------------------------------------------------------------------------------------------------------------------------------------------------------------------------------------------------------------------------------------------------------------------------------------------------------------------------------------------------------------------------------------------------------------------------------------------------------------------------------------------------------------------------------------------------------------------------------------------------------------------------------------------------------------------------------------------------------------------------------------------------------------------------------------------------------------------------------------------------------------------------------------------------------------------------------------------------------------------------------------------------------------------------------------------------------------------------------------------------------------------------------------------------------------------------------------------------------------------------------------------------------------------------------------------------------------------------------------------------------------------------------------------------------------------------------------------------------------------------------------------------------------------------------------------------------------------------------------------------------------------------------------------------------------------------------------------------------------------------------------------------------------------------------------------------------------------------------------------------------------------------------------------------------------------------------------------------------------------------------------------------------------------------------------------------------------------------------------------------------------------------------------------------------------------------------------------------------------------------------------------------------------------------------------------------------------------------------------------------------------------------------------------------------------------------------------------------------------------------------------------------------------------------------------------------------------------------------------------------------------------------------------------------------------------------------------------------------------------------------------------------------------------------------------------------------------------------------------------------------------------------------------------------------------------------------------------------------------------------------------------------------------------------------------------------------------------------------------------------------------------------------------------------------------------------------------------------------------------------------------------------------------------------------------------------------------------------------------------------------------------------------------------------------------------------------------------------------------------------------------------------------------------------------------------------------------------------------------------------------------------------------------------------------------------------------------------------------------------------------------------------------------------------------------------------------------------------------------------------------------------------------------------------------------------------------------------------------------------------------------------------------------------------------------------------------------------------------------------------------------------------------------------------|--|--|
| <div style="display: flex; justify-content: space-between; border-bottom: 1px solid black; margin-bottom: 10px;"> <div style="width: 30%;">General information</div> </div> <div style="display: flex; justify-content: space-between;"> <div style="width: 30%; border: 1px solid black; padding: 5px;">Technology designation<br/>T2 Aerosol Coating</div> <div style="width: 40%; border: 1px solid black; padding: 5px;">Responsible person, function, organization/institute, department</div> <div style="width: 25%; border: 1px solid black; padding: 5px;">Date</div> </div>                                                                                                                                                                                                                                                                                                                                                                                                                                                                                                                                                                                                                                                                                                                                                                                                                                                                                                                                                                                                                                                                                                                                                                                                                                                                                                                                                                                                                                                                                                                                                                                                                                                                                                                                                                                                                                                                                                                                                                                                                                                                                                                                                                                                                                                                                                                                                                                                                                                                                                                                                                                                                                                                                                                                                                                                                                                                                                                                                                                                                                                                                                                                                                                                                                                                                                                                                                                                                                                                                                                                                                                                                                                                                                                                                                                                                                                                                                                                                                                                                                                                                                                                                                                                                                                                                                                                                                                                                                                                                                                                                                                                                                                                                                                                                                                                                                                                                                                                                                                                                                                                                                                                                                                                                                                                                                                                                                                                                                                                                                                                                                                                                                                                                                                                                                                                                                                                                                                                                                                                                                                                                                                                                   |  |  |
| <div style="border: 1px solid black; padding: 5px; margin-bottom: 10px;"> <b>3. Development of technology</b> </div> <div style="border: 1px solid black; padding: 5px; margin-bottom: 10px;"> <b>Maturity level description</b><br/>                     In this stage, the requirements and findings from stage 2 are checked. Alternative concepts are developed and the best concept selected. The result of the stage contains the essential information for the construction of the prototype.                 </div> <div style="display: flex; justify-content: space-between;"> <div style="width: 65%;"> <p><b>3.1</b></p> <p>Were the influencing factors and requirements from level 2 documented and checked, including mathematical models, calculations or simulations?</p> </div> <div style="width: 30%;"> <p>yes <input type="checkbox"/>      no <input type="checkbox"/>      uncertain <input type="checkbox"/></p> <p>Degree of fulfilment / uncertainty:</p> <div style="border: 1px solid black; height: 15px; width: 100%; position: relative;"> <div style="position: absolute; background: linear-gradient(to right, #ccc 49%, #eee 49% 51%, #eee 51% 53%, #fff 53% 55%, #fff 55% 57%, #ddd 57% 59%, #ddd 59% 61%, #ccc 61% 63%, #ccc 63% 65%, #bbb 65% 67%, #bbb 67% 69%, #aaa 69% 71%, #aaa 71% 73%, #999 73% 75%, #999 75% 77%, #888 77% 79%, #888 79% 81%, #777 81% 83%, #777 83% 85%, #666 85% 87%, #666 87% 89%, #555 89% 91%, #555 91% 93%, #444 93% 95%, #444 95% 97%, #333 97% 99%, #333 99% 100%); width: 49%;"></div> </div> </div> </div> <div style="display: flex; justify-content: space-between;"> <div style="width: 65%;"> <p><b>3.2</b></p> <p>Are the essential parameters of the aerosol coating described? Is it known how to set the parameters for the individual functions?<br/>Parameters: Starting material, carrier gas and its consumption, nozzle settings, gas system settings and vibration system settings</p> </div> <div style="width: 30%;"> <p>yes <input type="checkbox"/>      no <input type="checkbox"/>      uncertain <input type="checkbox"/></p> <p>Degree of fulfilment / uncertainty:</p> <div style="border: 1px solid black; height: 15px; width: 100%; position: relative;"> <div style="position: absolute; background: linear-gradient(to right, #ccc 49%, #eee 49% 51%, #eee 51% 53%, #fff 53% 55%, #fff 55% 57%, #ddd 57% 59%, #ddd 59% 61%, #ccc 61% 63%, #ccc 63% 65%, #bbb 65% 67%, #bbb 67% 69%, #aaa 69% 71%, #aaa 71% 73%, #999 73% 75%, #999 75% 77%, #888 77% 79%, #888 79% 81%, #777 81% 83%, #777 83% 85%, #666 85% 87%, #666 87% 89%, #555 89% 91%, #555 91% 93%, #444 93% 95%, #444 95% 97%, #333 97% 99%, #333 99% 100%); width: 49%;"></div> </div> </div> </div> <div style="display: flex; justify-content: space-between;"> <div style="width: 65%;"> <p><b>3.3</b></p> <p>Are the essential interdependencies and interactions as well as possibilities of influencing the parameters (partly theoretically) known?</p> </div> <div style="width: 30%;"> <p>yes <input type="checkbox"/>      no <input type="checkbox"/>      uncertain <input type="checkbox"/></p> <p>Degree of fulfilment / uncertainty:</p> <div style="border: 1px solid black; height: 15px; width: 100%; position: relative;"> <div style="position: absolute; background: linear-gradient(to right, #ccc 49%, #eee 49% 51%, #eee 51% 53%, #fff 53% 55%, #fff 55% 57%, #ddd 57% 59%, #ddd 59% 61%, #ccc 61% 63%, #ccc 63% 65%, #bbb 65% 67%, #bbb 67% 69%, #aaa 69% 71%, #aaa 71% 73%, #999 73% 75%, #999 75% 77%, #888 77% 79%, #888 79% 81%, #777 81% 83%, #777 83% 85%, #666 85% 87%, #666 87% 89%, #555 89% 91%, #555 91% 93%, #444 93% 95%, #444 95% 97%, #333 97% 99%, #333 99% 100%); width: 49%;"></div> </div> </div> </div> <div style="display: flex; justify-content: space-between;"> <div style="width: 65%;"> <p><b>3.4</b></p> <p>Was the coarse process window of the technology formulated on the basis of calculations or simulations?</p> </div> <div style="width: 30%;"> <p>yes <input type="checkbox"/>      no <input type="checkbox"/>      uncertain <input type="checkbox"/></p> <p>Degree of fulfilment / uncertainty:</p> <div style="border: 1px solid black; height: 15px; width: 100%; position: relative;"> <div style="position: absolute; background: linear-gradient(to right, #ccc 49%, #eee 49% 51%, #eee 51% 53%, #fff 53% 55%, #fff 55% 57%, #ddd 57% 59%, #ddd 59% 61%, #ccc 61% 63%, #ccc 63% 65%, #bbb 65% 67%, #bbb 67% 69%, #aaa 69% 71%, #aaa 71% 73%, #999 73% 75%, #999 75% 77%, #888 77% 79%, #888 79% 81%, #777 81% 83%, #777 83% 85%, #666 85% 87%, #666 87% 89%, #555 89% 91%, #555 91% 93%, #444 93% 95%, #444 95% 97%, #333 97% 99%, #333 99% 100%); width: 49%;"></div> </div> </div> </div> <div style="display: flex; justify-content: space-between;"> <div style="width: 65%;"> <p><b>3.5</b></p> <p>Are the essential components and elements required to build a prototype/system known?</p> </div> <div style="width: 30%;"> <p>yes <input type="checkbox"/>      no <input type="checkbox"/>      uncertain <input type="checkbox"/></p> <p>Degree of fulfilment / uncertainty:</p> <div style="border: 1px solid black; height: 15px; width: 100%; position: relative;"> <div style="position: absolute; background: linear-gradient(to right, #ccc 49%, #eee 49% 51%, #eee 51% 53%, #fff 53% 55%, #fff 55% 57%, #ddd 57% 59%, #ddd 59% 61%, #ccc 61% 63%, #ccc 63% 65%, #bbb 65% 67%, #bbb 67% 69%, #aaa 69% 71%, #aaa 71% 73%, #999 73% 75%, #999 75% 77%, #888 77% 79%, #888 79% 81%, #777 81% 83%, #777 83% 85%, #666 85% 87%, #666 87% 89%, #555 89% 91%, #555 91% 93%, #444 93% 95%, #444 95% 97%, #333 97% 99%, #333 99% 100%); width: 49%;"></div> </div> </div> </div> <div style="display: flex; justify-content: space-between;"> <div style="width: 65%;"> <p><b>3.6</b></p> <p>Notes:</p> </div> <div style="width: 30%;"> <p>yes <input type="checkbox"/>      no <input type="checkbox"/>      uncertain <input type="checkbox"/></p> <p>Degree of fulfilment / uncertainty:</p> <div style="border: 1px solid black; height: 15px; width: 100%; position: relative;"> <div style="position: absolute; background: linear-gradient(to right, #ccc 49%, #eee 49% 51%, #eee 51% 53%, #fff 53% 55%, #fff 55% 57%, #ddd 57% 59%, #ddd 59% 61%, #ccc 61% 63%, #ccc 63% 65%, #bbb 65% 67%, #bbb 67% 69%, #aaa 69% 71%, #aaa 71% 73%, #999 73% 75%, #999 75% 77%, #888 77% 79%, #888 79% 81%, #777 81% 83%, #777 83% 85%, #666 85% 87%, #666 87% 89%, #555 89% 91%, #555 91% 93%, #444 93% 95%, #444 95% 97%, #333 97% 99%, #333 99% 100%); width: 49%;"></div> </div> </div> </div> |  |  |

Figure S 3: Exemplary questionnaire to determine technology maturity – stage 3 (adapted and translated from Schindler (2015)<sup>1</sup>)

| Questionnaire to determine the maturity of aerosol coating for the production of ceramic solid state cells                                                                                                                                                                                                                                                                                                                     |                                                                                                                                                                                                                                                                                                                                                                                                                                                                                                                                                                                                                                                                                                                                                                                                   |  |
|--------------------------------------------------------------------------------------------------------------------------------------------------------------------------------------------------------------------------------------------------------------------------------------------------------------------------------------------------------------------------------------------------------------------------------|---------------------------------------------------------------------------------------------------------------------------------------------------------------------------------------------------------------------------------------------------------------------------------------------------------------------------------------------------------------------------------------------------------------------------------------------------------------------------------------------------------------------------------------------------------------------------------------------------------------------------------------------------------------------------------------------------------------------------------------------------------------------------------------------------|--|
| <div style="border: 1px solid black; padding: 5px;"> <div style="display: flex; justify-content: space-between; align-items: center;"> <div style="width: 30%;"> <p>General information</p> <p>Technology designation</p> <p>T2 Aerosol Coating</p> </div> <div style="width: 40%;"> <p>Responsible person, function, organization/institute, department</p> </div> <div style="width: 25%;"> <p>Date</p> </div> </div> </div> |                                                                                                                                                                                                                                                                                                                                                                                                                                                                                                                                                                                                                                                                                                                                                                                                   |  |
| <p><b>4. Technology demonstrator</b></p> <p><b>Maturity level description</b></p> <p>In stage 4, a prototype is built for the first time. This should validate the previously determined process parameters and functions of the technology. The functional testing takes place in a laboratory environment whose framework conditions are similar to the real environment.</p>                                                |                                                                                                                                                                                                                                                                                                                                                                                                                                                                                                                                                                                                                                                                                                                                                                                                   |  |
| <p>4.1</p> <p>Was a functional prototype of the aerosol spraying system set up to describe the overall system?</p>                                                                                                                                                                                                                                                                                                             | <div style="display: flex; justify-content: space-around;"> <span>yes<br/><input type="checkbox"/></span> <span>no<br/><input type="checkbox"/></span> <span>uncertain<br/><input type="checkbox"/></span> </div> <p>Degree of fulfilment / uncertainty:</p> <div style="border: 1px solid black; height: 20px; position: relative;"> <div style="position: absolute; width: 100%; height: 100%; background: linear-gradient(to right, #ccc 49%, #fff 49% 51%, #fff 51% 53%, #ccc 53% 100%); background-size: 100% 100%;"></div> </div> <div style="display: flex; justify-content: space-between; font-size: 8px;"> <span>0</span><span>10</span><span>20</span><span>30</span><span>40</span><span>50</span><span>60</span><span>70</span><span>80</span><span>90</span><span>100</span> </div> |  |
| <p>4.2</p> <p>Have the main previously determined process parameters been validated?</p>                                                                                                                                                                                                                                                                                                                                       | <div style="display: flex; justify-content: space-around;"> <span>yes<br/><input type="checkbox"/></span> <span>no<br/><input type="checkbox"/></span> <span>uncertain<br/><input type="checkbox"/></span> </div> <p>Degree of fulfilment / uncertainty:</p> <div style="border: 1px solid black; height: 20px; position: relative;"> <div style="position: absolute; width: 100%; height: 100%; background: linear-gradient(to right, #ccc 49%, #fff 49% 51%, #fff 51% 53%, #ccc 53% 100%); background-size: 100% 100%;"></div> </div> <div style="display: flex; justify-content: space-between; font-size: 8px;"> <span>0</span><span>10</span><span>20</span><span>30</span><span>40</span><span>50</span><span>60</span><span>70</span><span>80</span><span>90</span><span>100</span> </div> |  |
| <p>4.3</p> <p>Have the main functions (e.g. supply of powder particles, homogeneous distribution of particles and carrier gas, transfer of particles through nozzle) of the system been validated?</p>                                                                                                                                                                                                                         | <div style="display: flex; justify-content: space-around;"> <span>yes<br/><input type="checkbox"/></span> <span>no<br/><input type="checkbox"/></span> <span>uncertain<br/><input type="checkbox"/></span> </div> <p>Degree of fulfilment / uncertainty:</p> <div style="border: 1px solid black; height: 20px; position: relative;"> <div style="position: absolute; width: 100%; height: 100%; background: linear-gradient(to right, #ccc 49%, #fff 49% 51%, #fff 51% 53%, #ccc 53% 100%); background-size: 100% 100%;"></div> </div> <div style="display: flex; justify-content: space-between; font-size: 8px;"> <span>0</span><span>10</span><span>20</span><span>30</span><span>40</span><span>50</span><span>60</span><span>70</span><span>80</span><span>90</span><span>100</span> </div> |  |
| <p>4.4</p> <p>Was the prototype built in a sufficient environment that reflects the conditions of the real production environment?</p>                                                                                                                                                                                                                                                                                         | <div style="display: flex; justify-content: space-around;"> <span>yes<br/><input type="checkbox"/></span> <span>no<br/><input type="checkbox"/></span> <span>uncertain<br/><input type="checkbox"/></span> </div> <p>Degree of fulfilment / uncertainty:</p> <div style="border: 1px solid black; height: 20px; position: relative;"> <div style="position: absolute; width: 100%; height: 100%; background: linear-gradient(to right, #ccc 49%, #fff 49% 51%, #fff 51% 53%, #ccc 53% 100%); background-size: 100% 100%;"></div> </div> <div style="display: flex; justify-content: space-between; font-size: 8px;"> <span>0</span><span>10</span><span>20</span><span>30</span><span>40</span><span>50</span><span>60</span><span>70</span><span>80</span><span>90</span><span>100</span> </div> |  |
| <p>4.5</p> <p>Is the applicability of the aerosol coating for the production of cell layers in a sufficiently similar environment proven?</p>                                                                                                                                                                                                                                                                                  | <div style="display: flex; justify-content: space-around;"> <span>yes<br/><input type="checkbox"/></span> <span>no<br/><input type="checkbox"/></span> <span>uncertain<br/><input type="checkbox"/></span> </div> <p>Degree of fulfilment / uncertainty:</p> <div style="border: 1px solid black; height: 20px; position: relative;"> <div style="position: absolute; width: 100%; height: 100%; background: linear-gradient(to right, #ccc 49%, #fff 49% 51%, #fff 51% 53%, #ccc 53% 100%); background-size: 100% 100%;"></div> </div> <div style="display: flex; justify-content: space-between; font-size: 8px;"> <span>0</span><span>10</span><span>20</span><span>30</span><span>40</span><span>50</span><span>60</span><span>70</span><span>80</span><span>90</span><span>100</span> </div> |  |
| <p>4.6</p> <p>Notes:</p>                                                                                                                                                                                                                                                                                                                                                                                                       | <div style="display: flex; justify-content: space-around;"> <span>yes<br/><input type="checkbox"/></span> <span>no<br/><input type="checkbox"/></span> <span>uncertain<br/><input type="checkbox"/></span> </div> <p>Degree of fulfilment / uncertainty:</p> <div style="border: 1px solid black; height: 20px; position: relative;"> <div style="position: absolute; width: 100%; height: 100%; background: linear-gradient(to right, #ccc 49%, #fff 49% 51%, #fff 51% 53%, #ccc 53% 100%); background-size: 100% 100%;"></div> </div> <div style="display: flex; justify-content: space-between; font-size: 8px;"> <span>0</span><span>10</span><span>20</span><span>30</span><span>40</span><span>50</span><span>60</span><span>70</span><span>80</span><span>90</span><span>100</span> </div> |  |

Figure S 4: Exemplary questionnaire to determine technology maturity – stage 4 (adapted and translated from Schindler (2015)<sup>1</sup>)



| Questionnaire to determine the maturity of aerosol coating for the production of ceramic solid state cells                                                                                                                                                                                                                                                                                                                                                                                                                                                                            |                                                                                                                                                                                                                                                                                                                                                                                                                                                                                                                                                                                                                                                                                                                                                          |  |
|---------------------------------------------------------------------------------------------------------------------------------------------------------------------------------------------------------------------------------------------------------------------------------------------------------------------------------------------------------------------------------------------------------------------------------------------------------------------------------------------------------------------------------------------------------------------------------------|----------------------------------------------------------------------------------------------------------------------------------------------------------------------------------------------------------------------------------------------------------------------------------------------------------------------------------------------------------------------------------------------------------------------------------------------------------------------------------------------------------------------------------------------------------------------------------------------------------------------------------------------------------------------------------------------------------------------------------------------------------|--|
| <div style="display: flex; justify-content: space-between; border-bottom: 1px solid black; margin-bottom: 10px;"> <div style="width: 30%;">General information</div> </div> <div style="display: flex; justify-content: space-between;"> <div style="width: 30%; border: 1px solid black; padding: 5px;">Technology designation<br/>T2 Aerosol Coating</div> <div style="width: 40%; border: 1px solid black; padding: 5px;">Responsible person, function, organization/institute, department</div> <div style="width: 20%; border: 1px solid black; padding: 5px;">Date</div> </div> |                                                                                                                                                                                                                                                                                                                                                                                                                                                                                                                                                                                                                                                                                                                                                          |  |
| <div style="border: 1px solid black; padding: 5px; margin-bottom: 10px;"> <b>5. Integration into equipment</b> </div> <div style="border: 1px solid black; padding: 5px; margin-bottom: 10px;"> <b>Maturity level description</b><br/>                     This stage involves the integration of the technology into an equipment in a laboratory environment under realistic conditions. The functions of the entire system and the process window can be tested and validated.                 </div>                                                                              |                                                                                                                                                                                                                                                                                                                                                                                                                                                                                                                                                                                                                                                                                                                                                          |  |
| <b>5.1</b><br>Has the aerosol coating been implemented in an equipment in a laboratory environment under realistic conditions with set process parameters?                                                                                                                                                                                                                                                                                                                                                                                                                            | <div style="display: flex; justify-content: space-around;"> <span>yes<br/><input type="checkbox"/></span> <span>no<br/><input type="checkbox"/></span> <span>uncertain<br/><input type="checkbox"/></span> </div> <p style="font-size: small;">Degree of fulfilment / uncertainty:</p> <div style="border: 1px solid black; height: 20px; position: relative;"> <div style="position: absolute; width: 0%; height: 100%; background: linear-gradient(to right, #ccc, #fff);"></div> </div> <div style="display: flex; justify-content: space-between; font-size: x-small;"> <span>0</span><span>10</span><span>20</span><span>30</span><span>40</span><span>50</span><span>60</span><span>70</span><span>80</span><span>90</span><span>100</span> </div> |  |
| <b>5.2</b><br>Are the relevant interactions between the parameters in the prototype known?                                                                                                                                                                                                                                                                                                                                                                                                                                                                                            | <div style="display: flex; justify-content: space-around;"> <span>yes<br/><input type="checkbox"/></span> <span>no<br/><input type="checkbox"/></span> <span>uncertain<br/><input type="checkbox"/></span> </div> <p style="font-size: small;">Degree of fulfilment / uncertainty:</p> <div style="border: 1px solid black; height: 20px; position: relative;"> <div style="position: absolute; width: 0%; height: 100%; background: linear-gradient(to right, #ccc, #fff);"></div> </div> <div style="display: flex; justify-content: space-between; font-size: x-small;"> <span>0</span><span>10</span><span>20</span><span>30</span><span>40</span><span>50</span><span>60</span><span>70</span><span>80</span><span>90</span><span>100</span> </div> |  |
| <b>5.3</b><br>Are the interactions between the aerosol coating and upstream and downstream technologies (drying, sintering, cutting, etc.) within the production line known/recorded?                                                                                                                                                                                                                                                                                                                                                                                                 | <div style="display: flex; justify-content: space-around;"> <span>yes<br/><input type="checkbox"/></span> <span>no<br/><input type="checkbox"/></span> <span>uncertain<br/><input type="checkbox"/></span> </div> <p style="font-size: small;">Degree of fulfilment / uncertainty:</p> <div style="border: 1px solid black; height: 20px; position: relative;"> <div style="position: absolute; width: 0%; height: 100%; background: linear-gradient(to right, #ccc, #fff);"></div> </div> <div style="display: flex; justify-content: space-between; font-size: x-small;"> <span>0</span><span>10</span><span>20</span><span>30</span><span>40</span><span>50</span><span>60</span><span>70</span><span>80</span><span>90</span><span>100</span> </div> |  |
| <b>5.4</b><br>Is a smooth production process possible when using aerosol coating in consideration of the given technology chain for the production of cell layers?<br>If not, which production step is problematic?                                                                                                                                                                                                                                                                                                                                                                   | <div style="display: flex; justify-content: space-around;"> <span>yes<br/><input type="checkbox"/></span> <span>no<br/><input type="checkbox"/></span> <span>uncertain<br/><input type="checkbox"/></span> </div> <p style="font-size: small;">Degree of fulfilment / uncertainty:</p> <div style="border: 1px solid black; height: 20px; position: relative;"> <div style="position: absolute; width: 0%; height: 100%; background: linear-gradient(to right, #ccc, #fff);"></div> </div> <div style="display: flex; justify-content: space-between; font-size: x-small;"> <span>0</span><span>10</span><span>20</span><span>30</span><span>40</span><span>50</span><span>60</span><span>70</span><span>80</span><span>90</span><span>100</span> </div> |  |
| <b>5.5</b><br>Were the parameters optimized to improve the process?                                                                                                                                                                                                                                                                                                                                                                                                                                                                                                                   | <div style="display: flex; justify-content: space-around;"> <span>yes<br/><input type="checkbox"/></span> <span>no<br/><input type="checkbox"/></span> <span>uncertain<br/><input type="checkbox"/></span> </div> <p style="font-size: small;">Degree of fulfilment / uncertainty:</p> <div style="border: 1px solid black; height: 20px; position: relative;"> <div style="position: absolute; width: 0%; height: 100%; background: linear-gradient(to right, #ccc, #fff);"></div> </div> <div style="display: flex; justify-content: space-between; font-size: x-small;"> <span>0</span><span>10</span><span>20</span><span>30</span><span>40</span><span>50</span><span>60</span><span>70</span><span>80</span><span>90</span><span>100</span> </div> |  |
| <b>5.6</b><br>Notes:                                                                                                                                                                                                                                                                                                                                                                                                                                                                                                                                                                  | <div style="display: flex; justify-content: space-around;"> <span>yes<br/><input type="checkbox"/></span> <span>no<br/><input type="checkbox"/></span> <span>uncertain<br/><input type="checkbox"/></span> </div> <p style="font-size: small;">Degree of fulfilment / uncertainty:</p> <div style="border: 1px solid black; height: 20px; position: relative;"> <div style="position: absolute; width: 0%; height: 100%; background: linear-gradient(to right, #ccc, #fff);"></div> </div> <div style="display: flex; justify-content: space-between; font-size: x-small;"> <span>0</span><span>10</span><span>20</span><span>30</span><span>40</span><span>50</span><span>60</span><span>70</span><span>80</span><span>90</span><span>100</span> </div> |  |

Figure S 5: Exemplary questionnaire to determine technology maturity – stage 5 (adapted and translated from Schindler (2015)<sup>1</sup>)

Questionnaire to determine the maturity of aerosol coating for the production of ceramic solid state cells

---

General information

|                                              |                                                                  |      |
|----------------------------------------------|------------------------------------------------------------------|------|
| Technology designation<br>T2 Aerosol Coating | Responsible person, function, organization/institute, department | Date |
|----------------------------------------------|------------------------------------------------------------------|------|

---

6. Production structure

Maturity level description

Stage six comprises the integration of the technology into a production structure with upstream and downstream technologies. The performance of the technology and its interactions can be determined under real environmental conditions.

|                                                                                                                                                                                        |                                                                                                                                                                                                                                          |
|----------------------------------------------------------------------------------------------------------------------------------------------------------------------------------------|------------------------------------------------------------------------------------------------------------------------------------------------------------------------------------------------------------------------------------------|
| <p>6.1</p> <p>Has the aerosol coating been successfully integrated into a production line for the production of cell layers?</p>                                                       | <p>yes                      no                      uncertain</p> <p><input type="checkbox"/>                      <input type="checkbox"/>                      <input type="checkbox"/></p> <p>Degree of fulfilment / uncertainty:</p> |
| <p>6.2</p> <p>Is it possible to link up with upstream and downstream technologies taking into account the continuous technology chain?</p>                                             | <p>yes                      no                      uncertain</p> <p><input type="checkbox"/>                      <input type="checkbox"/>                      <input type="checkbox"/></p> <p>Degree of fulfilment / uncertainty:</p> |
| <p>6.3</p> <p>Were the key figures and process parameters of the aerosol coating documented for the optimized production of a cell layer?</p>                                          | <p>yes                      no                      uncertain</p> <p><input type="checkbox"/>                      <input type="checkbox"/>                      <input type="checkbox"/></p> <p>Degree of fulfilment / uncertainty:</p> |
| <p>6.4</p> <p>Has a functional electrolyte/electrode been produced with a technology chain that uses aerosol coating as a coating technology?</p>                                      | <p>yes                      no                      uncertain</p> <p><input type="checkbox"/>                      <input type="checkbox"/>                      <input type="checkbox"/></p> <p>Degree of fulfilment / uncertainty:</p> |
| <p>6.5</p> <p>Is the performance of the aerosol coating for the production of the electrolyte/electrode under consideration/evaluation of the setpoint/actual value results given?</p> | <p>yes                      no                      uncertain</p> <p><input type="checkbox"/>                      <input type="checkbox"/>                      <input type="checkbox"/></p> <p>Degree of fulfilment / uncertainty:</p> |
| <p>6.6</p> <p>Notes:</p>                                                                                                                                                               | <p>yes                      no                      uncertain</p> <p><input type="checkbox"/>                      <input type="checkbox"/>                      <input type="checkbox"/></p> <p>Degree of fulfilment / uncertainty:</p> |

Figure S 6: Exemplary questionnaire to determine technology maturity – stage 6 (adapted and translated from Schindler (2015)<sup>1)</sup>)

| Questionnaire to determine the maturity of aerosol coating for the production of ceramic solid state cells                                                                                                                                                                                                                                                                                                                     |                                                                                                                                                                                                                                                                                                                                                                                                                                                                                                                                                                                                                                                                                                                                                                                                                                                                                                                                                                                                                                                                                                                                                                                                                                     |  |
|--------------------------------------------------------------------------------------------------------------------------------------------------------------------------------------------------------------------------------------------------------------------------------------------------------------------------------------------------------------------------------------------------------------------------------|-------------------------------------------------------------------------------------------------------------------------------------------------------------------------------------------------------------------------------------------------------------------------------------------------------------------------------------------------------------------------------------------------------------------------------------------------------------------------------------------------------------------------------------------------------------------------------------------------------------------------------------------------------------------------------------------------------------------------------------------------------------------------------------------------------------------------------------------------------------------------------------------------------------------------------------------------------------------------------------------------------------------------------------------------------------------------------------------------------------------------------------------------------------------------------------------------------------------------------------|--|
| <div style="border: 1px solid black; padding: 5px;"> <div style="display: flex; justify-content: space-between; align-items: center;"> <div style="width: 30%;"> <p>General information</p> <p>Technology designation</p> <p>T2 Aerosol Coating</p> </div> <div style="width: 40%;"> <p>Responsible person, function, organization/institute, department</p> </div> <div style="width: 25%;"> <p>Date</p> </div> </div> </div> |                                                                                                                                                                                                                                                                                                                                                                                                                                                                                                                                                                                                                                                                                                                                                                                                                                                                                                                                                                                                                                                                                                                                                                                                                                     |  |
| <p><b>7. Series application</b></p> <div style="border: 1px solid black; padding: 5px;"> <p><b>Maturity level description</b></p> <p>Technologies, which are assigned to the last maturity stage, the industrial usability is given. Only a minimal further development of the technology takes place. The focus is on standardization.</p> </div>                                                                             |                                                                                                                                                                                                                                                                                                                                                                                                                                                                                                                                                                                                                                                                                                                                                                                                                                                                                                                                                                                                                                                                                                                                                                                                                                     |  |
| <p>7.1</p> <p>Has the aerosol coating been completely described by manufacturing and operating documents? (e.g. patents, certificates, guidelines, (DIN-) standards, etc.)</p>                                                                                                                                                                                                                                                 | <div style="display: flex; justify-content: space-around;"> <span>yes<br/><input type="checkbox"/></span> <span>no<br/><input type="checkbox"/></span> <span>uncertain<br/><input type="checkbox"/></span> </div> <p>Degree of fulfilment / uncertainty:</p> <div style="border: 1px solid black; height: 20px; position: relative;"> <div style="position: absolute; left: 0; top: -5px; bottom: -5px;">0</div> <div style="position: absolute; right: 0; top: -5px; bottom: -5px;">100</div> <div style="position: absolute; left: 10%; top: -5px; bottom: -5px;">10</div> <div style="position: absolute; left: 20%; top: -5px; bottom: -5px;">20</div> <div style="position: absolute; left: 30%; top: -5px; bottom: -5px;">30</div> <div style="position: absolute; left: 40%; top: -5px; bottom: -5px;">40</div> <div style="position: absolute; left: 50%; top: -5px; bottom: -5px;">50</div> <div style="position: absolute; left: 60%; top: -5px; bottom: -5px;">60</div> <div style="position: absolute; left: 70%; top: -5px; bottom: -5px;">70</div> <div style="position: absolute; left: 80%; top: -5px; bottom: -5px;">80</div> <div style="position: absolute; left: 90%; top: -5px; bottom: -5px;">90</div> </div> |  |
| <p>7.2</p> <p>Is the aerosol coating already used in real production?</p>                                                                                                                                                                                                                                                                                                                                                      | <div style="display: flex; justify-content: space-around;"> <span>yes<br/><input type="checkbox"/></span> <span>no<br/><input type="checkbox"/></span> <span>uncertain<br/><input type="checkbox"/></span> </div> <p>Degree of fulfilment / uncertainty:</p> <div style="border: 1px solid black; height: 20px; position: relative;"> <div style="position: absolute; left: 0; top: -5px; bottom: -5px;">0</div> <div style="position: absolute; right: 0; top: -5px; bottom: -5px;">100</div> <div style="position: absolute; left: 10%; top: -5px; bottom: -5px;">10</div> <div style="position: absolute; left: 20%; top: -5px; bottom: -5px;">20</div> <div style="position: absolute; left: 30%; top: -5px; bottom: -5px;">30</div> <div style="position: absolute; left: 40%; top: -5px; bottom: -5px;">40</div> <div style="position: absolute; left: 50%; top: -5px; bottom: -5px;">50</div> <div style="position: absolute; left: 60%; top: -5px; bottom: -5px;">60</div> <div style="position: absolute; left: 70%; top: -5px; bottom: -5px;">70</div> <div style="position: absolute; left: 80%; top: -5px; bottom: -5px;">80</div> <div style="position: absolute; left: 90%; top: -5px; bottom: -5px;">90</div> </div> |  |
| <p>7.3</p> <p>Is the aerosol coating used to produce (oxide) ceramic coatings in real production?</p>                                                                                                                                                                                                                                                                                                                          | <div style="display: flex; justify-content: space-around;"> <span>yes<br/><input type="checkbox"/></span> <span>no<br/><input type="checkbox"/></span> <span>uncertain<br/><input type="checkbox"/></span> </div> <p>Degree of fulfilment / uncertainty:</p> <div style="border: 1px solid black; height: 20px; position: relative;"> <div style="position: absolute; left: 0; top: -5px; bottom: -5px;">0</div> <div style="position: absolute; right: 0; top: -5px; bottom: -5px;">100</div> <div style="position: absolute; left: 10%; top: -5px; bottom: -5px;">10</div> <div style="position: absolute; left: 20%; top: -5px; bottom: -5px;">20</div> <div style="position: absolute; left: 30%; top: -5px; bottom: -5px;">30</div> <div style="position: absolute; left: 40%; top: -5px; bottom: -5px;">40</div> <div style="position: absolute; left: 50%; top: -5px; bottom: -5px;">50</div> <div style="position: absolute; left: 60%; top: -5px; bottom: -5px;">60</div> <div style="position: absolute; left: 70%; top: -5px; bottom: -5px;">70</div> <div style="position: absolute; left: 80%; top: -5px; bottom: -5px;">80</div> <div style="position: absolute; left: 90%; top: -5px; bottom: -5px;">90</div> </div> |  |
| <p>7.4</p> <p>Is the aerosol coating used for the production of oxide ceramic solid state batteries in a real production?</p>                                                                                                                                                                                                                                                                                                  | <div style="display: flex; justify-content: space-around;"> <span>yes<br/><input type="checkbox"/></span> <span>no<br/><input type="checkbox"/></span> <span>uncertain<br/><input type="checkbox"/></span> </div> <p>Degree of fulfilment / uncertainty:</p> <div style="border: 1px solid black; height: 20px; position: relative;"> <div style="position: absolute; left: 0; top: -5px; bottom: -5px;">0</div> <div style="position: absolute; right: 0; top: -5px; bottom: -5px;">100</div> <div style="position: absolute; left: 10%; top: -5px; bottom: -5px;">10</div> <div style="position: absolute; left: 20%; top: -5px; bottom: -5px;">20</div> <div style="position: absolute; left: 30%; top: -5px; bottom: -5px;">30</div> <div style="position: absolute; left: 40%; top: -5px; bottom: -5px;">40</div> <div style="position: absolute; left: 50%; top: -5px; bottom: -5px;">50</div> <div style="position: absolute; left: 60%; top: -5px; bottom: -5px;">60</div> <div style="position: absolute; left: 70%; top: -5px; bottom: -5px;">70</div> <div style="position: absolute; left: 80%; top: -5px; bottom: -5px;">80</div> <div style="position: absolute; left: 90%; top: -5px; bottom: -5px;">90</div> </div> |  |
| <p>7.5</p> <p>Is the know-how about the aerosol coating sufficiently secured? (Can every skilled employee of the company build up and use the technology with available documents?)<br/>Is there a standardized process?</p>                                                                                                                                                                                                   | <div style="display: flex; justify-content: space-around;"> <span>yes<br/><input type="checkbox"/></span> <span>no<br/><input type="checkbox"/></span> <span>uncertain<br/><input type="checkbox"/></span> </div> <p>Degree of fulfilment / uncertainty:</p> <div style="border: 1px solid black; height: 20px; position: relative;"> <div style="position: absolute; left: 0; top: -5px; bottom: -5px;">0</div> <div style="position: absolute; right: 0; top: -5px; bottom: -5px;">100</div> <div style="position: absolute; left: 10%; top: -5px; bottom: -5px;">10</div> <div style="position: absolute; left: 20%; top: -5px; bottom: -5px;">20</div> <div style="position: absolute; left: 30%; top: -5px; bottom: -5px;">30</div> <div style="position: absolute; left: 40%; top: -5px; bottom: -5px;">40</div> <div style="position: absolute; left: 50%; top: -5px; bottom: -5px;">50</div> <div style="position: absolute; left: 60%; top: -5px; bottom: -5px;">60</div> <div style="position: absolute; left: 70%; top: -5px; bottom: -5px;">70</div> <div style="position: absolute; left: 80%; top: -5px; bottom: -5px;">80</div> <div style="position: absolute; left: 90%; top: -5px; bottom: -5px;">90</div> </div> |  |
| <p>7.6</p> <p>Notes:</p>                                                                                                                                                                                                                                                                                                                                                                                                       | <div style="display: flex; justify-content: space-around;"> <span>yes<br/><input type="checkbox"/></span> <span>no<br/><input type="checkbox"/></span> <span>uncertain<br/><input type="checkbox"/></span> </div> <p>Degree of fulfilment / uncertainty:</p> <div style="border: 1px solid black; height: 20px; position: relative;"> <div style="position: absolute; left: 0; top: -5px; bottom: -5px;">0</div> <div style="position: absolute; right: 0; top: -5px; bottom: -5px;">100</div> <div style="position: absolute; left: 10%; top: -5px; bottom: -5px;">10</div> <div style="position: absolute; left: 20%; top: -5px; bottom: -5px;">20</div> <div style="position: absolute; left: 30%; top: -5px; bottom: -5px;">30</div> <div style="position: absolute; left: 40%; top: -5px; bottom: -5px;">40</div> <div style="position: absolute; left: 50%; top: -5px; bottom: -5px;">50</div> <div style="position: absolute; left: 60%; top: -5px; bottom: -5px;">60</div> <div style="position: absolute; left: 70%; top: -5px; bottom: -5px;">70</div> <div style="position: absolute; left: 80%; top: -5px; bottom: -5px;">80</div> <div style="position: absolute; left: 90%; top: -5px; bottom: -5px;">90</div> </div> |  |

Figure S 7: Exemplary questionnaire to determine technology maturity – stage 7 (adapted and translated from Schindler (2015)<sup>1</sup>)

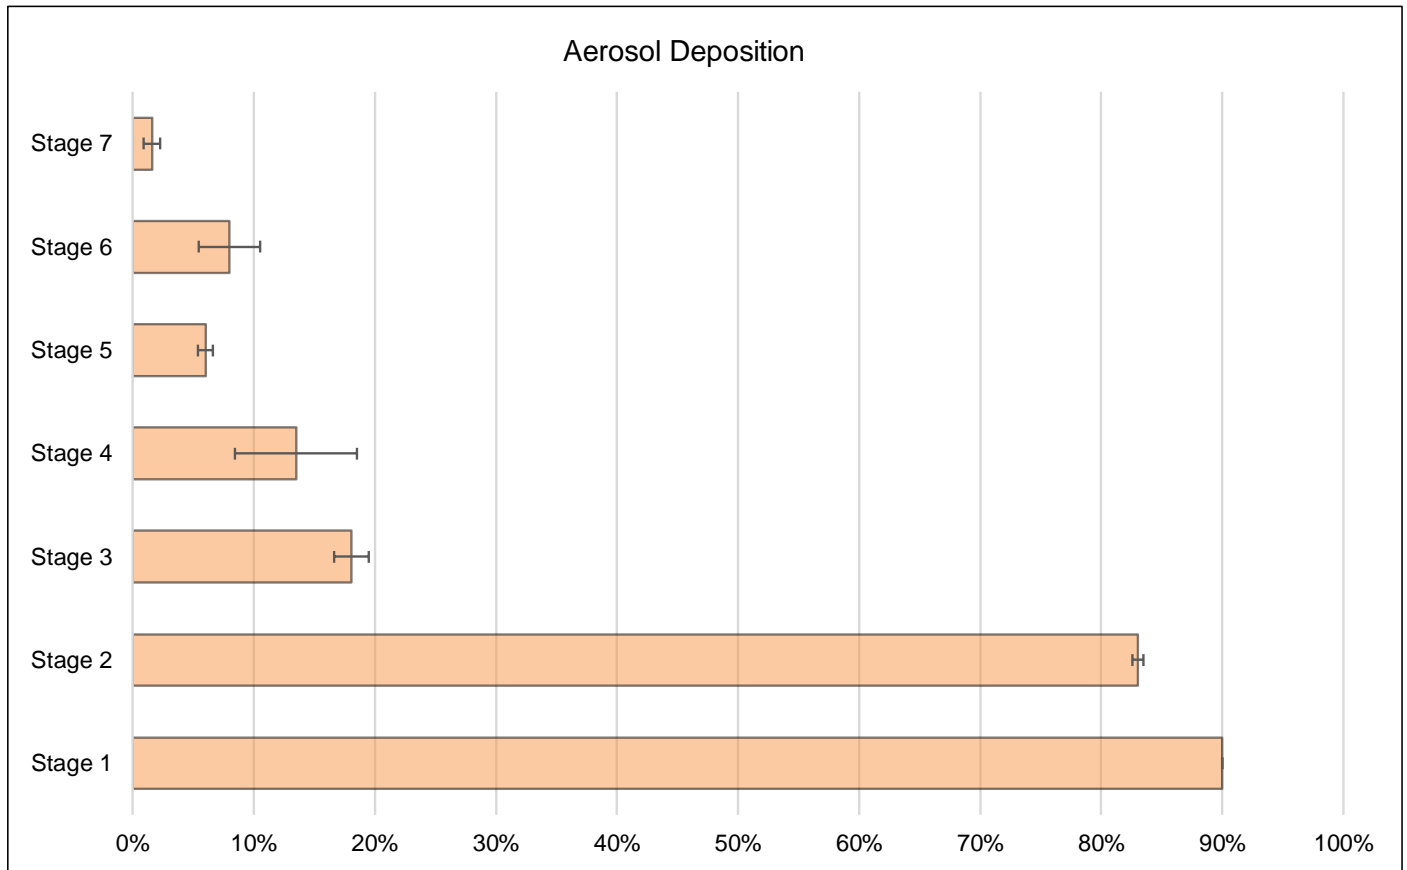

Figure S 8: Exemplary evaluation of technology readiness by stages 1-7

### S3. Assumptions for cost estimation

Table S 5: Densities and prices of cell materials used for cost estimation

|                             | Density                 | Ref. | Cost             | Ref.                     |
|-----------------------------|-------------------------|------|------------------|--------------------------|
| <b>HE-NMC</b>               | 4.25 g/cm <sup>3</sup>  | 2    | 20 \$/kg         | 3                        |
| <b>LNMO</b>                 | 4.4 g/cm <sup>3</sup>   | 4    | 21 \$/kg         | 4                        |
| <b>NMC 811</b>              | 4.7 g/cm <sup>3</sup>   | 2    | 24 \$/kg         | 3                        |
| <b>Carbon Black</b>         | 2 g/cm <sup>3</sup>     | 5    | 7.15 \$/kg       | 6                        |
| <b>PVdF</b>                 | 1.76 g/cm <sup>3</sup>  | 5    | 21.5 \$/kg       | 7                        |
| <b>LLZ</b>                  | 5.1 g/cm <sup>3</sup>   | 2    | variable         |                          |
| <b>Li</b>                   | 0.534 g/cm <sup>3</sup> | 8    | 250 \$/kg        | 3                        |
| <b>Al foil</b>              | 2.7 g/cm <sup>3</sup>   | 8    | 6 \$/kg          | 3                        |
| <b>Cu foil*</b>             | 8.92 g/cm <sup>3</sup>  | 8    | 13 \$/kg         | 3                        |
| <b>Al hard case (HEV)**</b> | 2.7 g/cm <sup>3</sup>   | 8    | 1.23 per housing | Calculated from Ref. [7] |

\*For the calculation, a bipolar Al current collector with a 100 nm thick Cu layer was assumed. Since no data for fabrication of such a thin Cu layer could be found in literature, the referenced price for Cu foil was assumed, which accounts to approximately twice the Cu raw material price (approx. 6 \$/kg).

\*\*The indicated reference states a price per PHEV2<sup>9</sup> hard case cell housing. Cost for a HEV cell housing were calculated by geometrical considerations, assuming that material cost and fabrication cost scale proportionally with dimensions.

## Supplementary references

1. Schindler, S. *Strategische Planung von Technologieketten für die Produktion*. Techn. Univ. München, Diss., 2015. (Utz, München, 2015).
2. Placke, T., Kloepsch, R., Dühnen, S. & Winter, M. Lithium ion, lithium metal, and alternative rechargeable battery technologies. The odyssey for high energy density. *J Solid State Electrochem* **21**, 1939–1964 (2017).
3. Schmuch, R., Wagner, R., Hörpel, G., Placke, T. & Winter, M. Performance and cost of materials for lithium-based rechargeable automotive batteries. *Nat. Energy* **3**, 267–278 (2018).
4. Berg, E.J., Villevieille, C., Streich, D., Trabesinger, S. & Novák, P. Rechargeable Batteries: Grasping for the Limits of Chemistry. *J. Electrochem. Soc.* **162**, A2468-A2475 (2015).
5. Marks, T., Trussler, S., Smith, A.J., Xiong, D. & Dahn, J.R. A Guide to Li-Ion Coin-Cell Electrode Making for Academic Researchers. *J. Electrochem. Soc.* **158**, A51 (2011).
6. Patry, G., Romagny, A., Martinet, S. & Froelich, D. Cost modeling of lithium-ion battery cells for automotive applications. *Energy Sci Eng* **3**, 71–82 (2015).
7. Schünemann, J.-H. *Modell zur Bewertung der Herstellkosten von Lithiumionenbatteriezellen*. Techn. Univ. Braunschweig, Diss., 2015. (Sierke, Göttingen, 2015).
8. N.N. Greenwood & A. Earnshaw eds. *Chemistry of the elements* (Elsevier-Butterworth Heinemann, Amsterdam, 2016).
9. DIN. *Electrically propelled road vehicles – Battery systems – Design specifications for Lithium-ion battery cells* (Beuth, Berlin, 2016).
